# Supplementary material for: Up-regulation of Biglycan is Associated with Poor Prognosis and PTEN Deletion in Patients with Prostate Cancer
Source: PubMed Central journal article supplement — Neoplasia. 2017 Aug 19;19(9):707–15. doi: 10.1016/j.neo.2017.06.003 (PMC5565634; doi:10.1016/j.neo.2017.06.003), 2017-08-19

**Supplementary Table 1.** Association between BGN staining and prostate cancer phenotype in ERG fusion *negative* tumors

| Parameter                       | n evaluable | BGN          |         |          | p value  |
|---------------------------------|-------------|--------------|---------|----------|----------|
|                                 |             | negative (%) | low (%) | high (%) |          |
| <b>All cancers</b>              | 5,479       | 26.2         | 47.4    | 26.4     |          |
| <b>Tumor stage</b>              |             |              |         |          | p<0.0001 |
| pT2                             | 3,702       | 28.5         | 48.1    | 23.4     |          |
| pT3a                            | 1,092       | 24.1         | 46.6    | 29.3     |          |
| pT3b-pT4                        | 668         | 16.9         | 44.6    | 38.5     |          |
| <b>Gleason grade</b>            |             |              |         |          | p<0.0001 |
| ≤3+3                            | 1,180       | 32.5         | 47.2    | 20.3     |          |
| 3+4                             | 3,101       | 26.1         | 47.2    | 26.6     |          |
| 4+3                             | 873         | 20.6         | 50.1    | 29.3     |          |
| ≥4+4                            | 302         | 18.9         | 42.4    | 38.7     |          |
| <b>Lymph node metastasis</b>    |             |              |         |          | p<0.0001 |
| N0                              | 3,191       | 24.6         | 47.8    | 27.6     |          |
| N+                              | 300         | 16.3         | 45.3    | 38.3     |          |
| <b>Preop. PSA level (ng/ml)</b> |             |              |         |          | p<0.0001 |
| <4                              | 580         | 25.2         | 50.5    | 24.3     |          |
| 4-10                            | 3,242       | 26.9         | 48.8    | 24.3     |          |
| 10-20                           | 1,182       | 25.4         | 43.4    | 31.2     |          |
| >20                             | 428         | 24.3         | 44.2    | 31.5     |          |
| <b>Surgical margin</b>          |             |              |         |          | p=0.1427 |
| negative                        | 4,381       | 26.1         | 47.9    | 26.0     |          |
| positive                        | 1,001       | 26.5         | 44.9    | 28.7     |          |

**Supplementary Table 2.** Association between BGN staining and prostate cancer phenotype in ERG fusion *positive* tumor

| Parameter                       | n evaluable | BGN          |         |          | p value  |
|---------------------------------|-------------|--------------|---------|----------|----------|
|                                 |             | negative (%) | low (%) | high (%) |          |
| <b>All cancers</b>              | 4,207       | 12.8         | 49.3    | 38.0     |          |
| <b>Tumor stage</b>              |             |              |         |          | p<0.0001 |
| pT2                             | 2,505       | 14.8         | 51.9    | 33.4     |          |
| pT3a                            | 1,104       | 10.1         | 48.1    | 41.8     |          |
| pT3b-pT4                        | 579         | 9.7          | 40.8    | 49.6     |          |
| <b>Gleason grade</b>            |             |              |         |          | p<0.0001 |
| ≤3+3                            | 903         | 17.2         | 53.3    | 29.6     |          |
| 3+4                             | 2,485       | 12.3         | 50.2    | 37.5     |          |
| 4+3                             | 631         | 9.8          | 43.1    | 47.1     |          |
| ≥4+4                            | 165         | 9.1          | 38.2    | 52.7     |          |
| <b>Lymph node metastasis</b>    |             |              |         |          | p=0.0021 |
| N0                              | 2,407       | 11.1         | 48.4    | 40.4     |          |
| N+                              | 274         | 8.4          | 40.1    | 51.5     |          |
| <b>Preop. PSA level (ng/ml)</b> |             |              |         |          | p<0.0001 |
| <4                              | 575         | 15.3         | 49.9    | 34.8     |          |
| 4-10                            | 2,562       | 13.5         | 51.5    | 35.0     |          |
| 10-20                           | 757         | 10.7         | 43.9    | 45.4     |          |
| >20                             | 259         | 6.2          | 42.5    | 51.4     |          |
| <b>Surgical margin</b>          |             |              |         |          | p<0.0001 |
| negative                        | 3,291       | 13.8         | 49.7    | 36.4     |          |
| positive                        | 838         | 9.2          | 48.0    | 42.8     |          |

**Supplementary Table 3.** Multivariate Cox regression analysis with established prognostic parameters and BGN expression in prostate cancers. Scenario 1 combines preoperatively available parameters (preoperative PSA, clinical tumor (cT) stage, and preoperative Gleason grade obtained on the original biopsy) with the postoperative BGN expression. In scenario 2 the biopsy Gleason is replaced by the Gleason grade obtained on radical prostatectomy (RPE). In scenario 3 cT stage is superseded by pathological tumor (pT) stage and surgical margin (R) status. In scenario 4 the lymph node (pN) stage is added.  $P_c$ -values are Bonferroni corrected by multiplication with 19.

| Scenario | Analyzable N | $P_c$ -value           |          |                      |                   |          |          |          | GLO1-Expression |
|----------|--------------|------------------------|----------|----------------------|-------------------|----------|----------|----------|-----------------|
|          |              | Preoperative PSA-Level | cT Stage | Gleason grade Biopsy | Gleason grade RPE | pT Stage | R Status | pN Stage |                 |
| 1        | 9,460        | <0.002                 | <0.002   | <0.002               | -                 | -        | -        | -        | 0.768           |
| 2        | 9,586        | <0.002                 | <0.002   | -                    | <0.002            | -        | -        | -        | 1               |
| 3        | 9,727        | <0.002                 | -        | -                    | <0.002            | <0.002   | <0.002   | -        | 1               |
| 4        | 6,054        | <0.002                 | -        | -                    | <0.002            | <0.002   | 0.01     | <0.002   | 1               |

**Supplementary Figure 1.** Prognostic impact of BGN expression in subsets of cancers defined by the Gleason score. a) Impact of negative and strongly positive BGN expression as compared to the classical Gleason score categories. b-h) Impact of negative and strongly positive BGN expression as compared to the quantitative Gleason score categories defined by subsets of cancers with b)  $\leq 5\%$  Gleason 4 patterns, c) 6-10% Gleason 4 patterns, d) 11-20% Gleason 4 patterns, e) 21-30% Gleason 4 patterns, f) 31-49 % Gleason 4 patterns, g) 50-60% Gleason 4 patterns, h) 61-100% Gleason 4 patterns

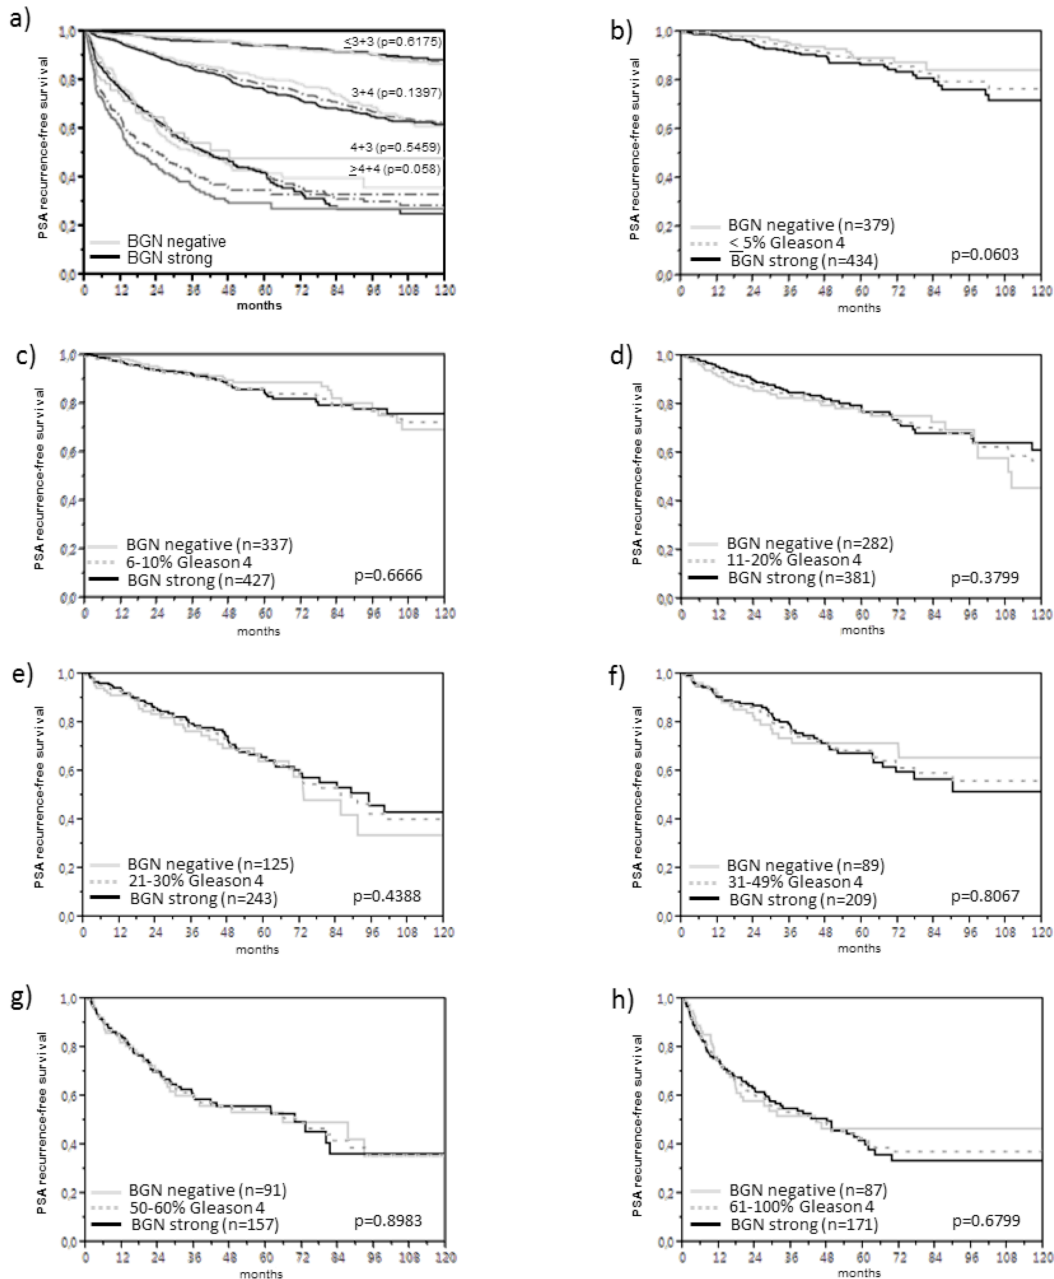

Supplement: mmc1.pdf [file mmc1.pdf]
